# Supplementary material
Source: Springer Nature journal article supplement (https://www.springermedizin.de/resource/supplementary/13046_2011_467_MOESM5_ESM.pdf/9662312)

**1****2****3****STAT3**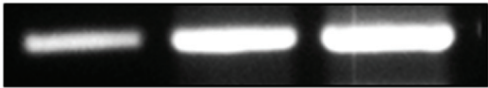**GAPDH**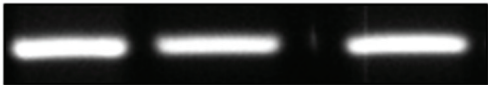

Supplement: MOESM5 [file 9662312]
